# Supplementary material for: EWSR1/ELF5 induces acute myeloid leukemia by inhibiting p53/p21 pathway
Source: PubMed Central journal article supplement — Cancer Sci. 2016 Nov 25;107(12):1745–54. doi: 10.1111/cas.13080 (PMC5198945; doi:10.1111/cas.13080), 2016-11-25
Supplement: CAS-107-1745-s001.pdf [file CAS-107-1745-s001.pdf]

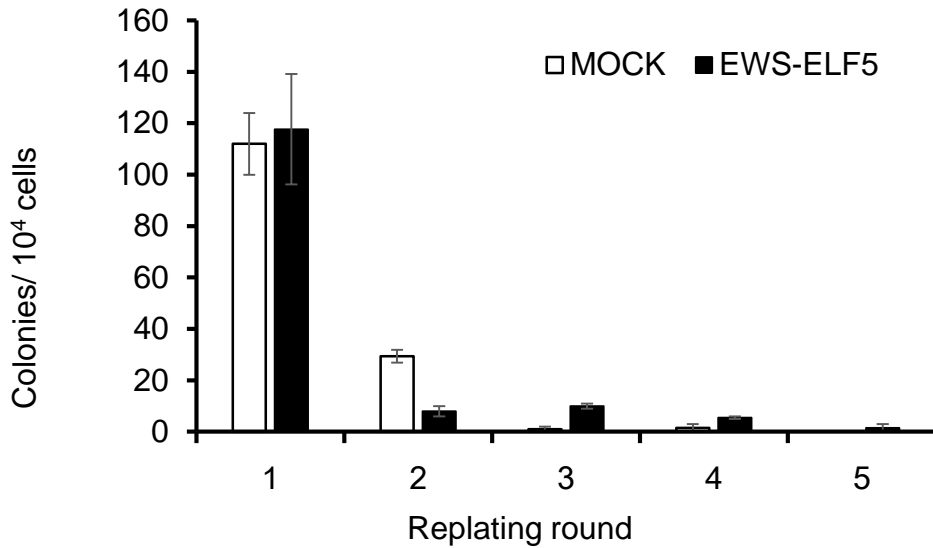

Supplementary Fig. S1, The *EWSR1/ELF5* fusion transcript does not stimulate colony formation in murine bone marrow cells. Colony-forming assays showing the number of CFU-GM (*colony* forming unit-granulocyte, macrophage) detected 7 days after plating cells transduced with *EWSR1/ELF5* or the empty vector (MOCK). The data are presented as the mean  $\pm$  SE of two independent experiments.
