# Supplementary material for: EWSR1/ELF5 induces acute myeloid leukemia by inhibiting p53/p21 pathway
Source: PubMed Central journal article supplement — Cancer Sci. 2016 Nov 25;107(12):1745–54. doi: 10.1111/cas.13080 (PMC5198945; doi:10.1111/cas.13080), 2016-11-25
Supplement: CAS-107-1745-s002.pdf [file CAS-107-1745-s002.pdf]

Supporting Table S1. Top 200 significantly up regulated genes in AML cells compare to EB-LCL.

| Name     | Log2Ratio   | Name       | Log2Ratio   | Name     | Log2Ratio   | Name     | Log2Ratio   |
|----------|-------------|------------|-------------|----------|-------------|----------|-------------|
| LYZ      | 14.71545345 | SERPINA1   | 7.937607149 | PRKCA    | 6.824219281 | QPCT     | 6.178491524 |
| TSPYL1   | 12.14510308 | SPP1       | 7.927924596 | GLIPR2   | 6.811637558 | BAG4     | 6.176418898 |
| ITGAX    | 12.05623577 | SHISA2     | 7.918176619 | CD3E     | 6.801068316 | GHRL     | 6.13145799  |
| CD34     | 11.44619691 | SNCA       | 7.905076007 | IGHA2    | 6.795754516 | IGFBP7   | 6.122996411 |
| CD3G     | 11.27608642 | GZMB       | 7.863352595 | TMEM33   | 6.761942926 | TMTC3    | 6.116191233 |
| HS3ST3B1 | 10.2459614  | ITGA2B     | 7.811637558 | HECA     | 6.735973288 | MYADM    | 6.094766677 |
| RIN2     | 10.20111058 | CARD16     | 7.807023039 | GLT25D1  | 6.686334593 | NFIL3    | 6.094427259 |
| TNFRSF25 | 10.16481659 | CNOT6L     | 7.778011437 | S100A16  | 6.667801785 | ADNP     | 6.094184769 |
| TRAT1    | 10.15965488 | CSGALNACT1 | 7.752524464 | BZW2     | 6.629484854 | FBXW4    | 6.093602626 |
| ADAM19   | 10.08719569 | SLC31A2    | 7.69659905  | TCF7L2   | 6.623498559 | EIF4E3   | 6.082839285 |
| STON2    | 10.01052168 | ANKRD34B   | 7.614472283 | CCR2     | 6.620496071 | NFIB     | 6.078469685 |
| MED12L   | 9.951575864 | ACVR2A     | 7.5414245   | KIAA1467 | 6.610845901 | SAR1A    | 6.073470603 |
| ARRDC3   | 9.80139978  | RAP2B      | 7.536821052 | EEPD1    | 6.608423238 | C1orf162 | 6.07115748  |
| RGL4     | 9.699447412 | ANKRD40    | 7.515326663 | TRGC2    | 6.602348724 | UBASH3A  | 6.053455478 |
| MS4A6A   | 9.682991996 | CSF1R      | 7.508021341 | KIT      | 6.596248524 | PRR5L    | 6.053455478 |
| PACS2    | 9.494965189 | TXK        | 7.494965189 | HBEGF    | 6.583970195 | TULP4    | 6.048789667 |
| SLC30A4  | 9.455072461 | CD14       | 7.4817898   | MASP2    | 6.518381853 | BCL11A   | 6.046216652 |
| MEIS1    | 9.438403519 | ELF5       | 7.438119328 | CHP1     | 6.518302031 | USP24    | 6.040676873 |
| IGSF10   | 9.404476484 | PRG2       | 7.39073782  | TMEM71   | 6.487074403 | RDH10    | 6.017386223 |
| FCRL3    | 9.359263907 | MTL5       | 7.386030817 | CASP2    | 6.476007447 | NOL9     | 6.014529966 |
| GSTA1    | 9.187311225 | CSF2RA     | 7.386030817 | CMTM7    | 6.468492977 | GIMAP7   | 6.012813493 |
| PFKFB2   | 9.117327661 | PYGL       | 7.303568657 | FCGR2A   | 6.461798325 | ARID2    | 6.006478489 |
| CD2      | 8.985068503 | STK17B     | 7.301472878 | KCNAB1   | 6.459559852 | PPP3CA   | 5.991187814 |
| ABCA1    | 8.902606343 | GFI1B      | 7.298567976 | FPR1     | 6.455072461 | MMP8     | 5.986623969 |
| FYB      | 8.881023621 | CYP24A1    | 7.283461083 | MMRN1    | 6.446055588 | DPEP2    | 5.980392016 |
| NKX3-1   | 8.853796178 | SLC40A1    | 7.280927817 | SEPP1    | 6.434704664 | IGHA1    | 5.965119872 |
| RNF144B  | 8.674572743 | S100A2     | 7.268194327 | PTGS2    | 6.427850993 | VSIG10   | 5.959806244 |
| FOS      | 8.66489019  | FCER1A     | 7.268194327 | MTSS1    | 6.420964607 | ITK      | 5.948821937 |
| HPGD     | 8.641383437 | LTF        | 7.205458571 | WRNIP1   | 6.419237862 | ZNF165   | 5.945169542 |
| SDK2     | 8.620496071 | GIMAP4     | 7.178491524 | LCLAT1   | 6.414143573 | SPOCK2   | 5.942424166 |
| PHACTR2  | 8.586536812 | FCN1       | 7.114484911 | SELP     | 6.407092433 | CD163    | 5.942424166 |
| IL7R     | 8.559095526 | SLC25A37   | 7.101971898 | WIPF3    | 6.364657166 | ULBP1    | 5.932773995 |
| DHRS3    | 8.558572716 | HBD        | 7.079927689 | CD8B     | 6.357461665 | BANK1    | 5.913794267 |
| KCNJ2    | 8.544912719 | ERP27      | 7.056420936 | RGS18    | 6.342962095 | IL1B     | 5.91327782  |
| VSTM1    | 8.494965189 | UBE2W      | 7.052240577 | SPNS3    | 6.328315319 | ARHGAP25 | 5.909230987 |
| MS4A3    | 8.475156707 | PAN3       | 7.033898719 | EGR1     | 6.325859667 | RBM6     | 5.902185676 |
| C16orf54 | 8.375098568 | BACH2      | 7.017386223 | CACUL1   | 6.300225294 | MBOAT1   | 5.89401196  |
| IGHG2    | 8.333325262 | FLT3       | 7.008226224 | TAGAP    | 6.291034303 | CD47     | 5.893757218 |
| FOXP1    | 8.300914203 | CA5B       | 6.984401361 | TGFBR2   | 6.275847899 | RAB31    | 5.893514565 |
| SLC48A1  | 8.233733025 | PRKAR2B    | 6.970993318 | CD68     | 6.274757014 | NABP1    | 5.89147525  |
| FCRL1    | 8.213451362 | XYLT2      | 6.945749626 | KIAA0430 | 6.274320429 | ZNF333   | 5.879517414 |
| TOB1     | 8.209873862 | TRIB2      | 6.937607149 | APOBEC3A | 6.268194327 | SEL1L3   | 5.876225676 |
| PADI2    | 8.193385739 | SRSF6      | 6.935431954 | RRAGD    | 6.26435226  | RNF169   | 5.8707227   |
| SERPINB6 | 8.156548971 | ITGA6      | 6.923058841 | SOX4     | 6.263403431 | C9orf72  | 5.867157507 |
| VAT1L    | 8.114484911 | ATP2B4     | 6.923058841 | POLR3E   | 6.249964171 | AASS     | 5.8470046   |
| SATB1    | 8.088644906 | MXD1       | 6.905898289 | CASP1    | 6.226959641 | ZDHHC2   | 5.843972817 |
| BROX     | 8.004482341 | PRF1       | 6.893514565 | LAIR1    | 6.221400115 | FAM210B  | 5.842888492 |
| GPR83    | 7.944826656 | CD8A       | 6.893514565 | SLC18A2  | 6.213451362 | MAF      | 5.832546548 |

Supporting Table S2. Top 200 significantly down regulated genes in AML cells compare to EB-LCL.

| Name     | Log2Ratio    | Name    | Log2Ratio    | Name     | Log2Ratio    | Name     | Log2Ratio    |
|----------|--------------|---------|--------------|----------|--------------|----------|--------------|
| PLA1A    | -9.840983377 | MGLL    | -5.771105552 | PRLR     | -4.986834243 | THOP1    | -4.456319526 |
| FABP5    | -9.819724257 | NARFL   | -5.745826144 | PDP2     | -4.986834243 | TMUB1    | -4.456319526 |
| LTA      | -9.416192698 | IFI6    | -5.74254356  | DTX2     | -4.986834243 | PDCD1    | -4.415677542 |
| CDKN1A   | -8.355172803 | CHL1    | -5.734855026 | MRPS2    | -4.979881482 | ZBTB32   | -4.415677542 |
| FXYD2    | -8.232813485 | NCF1    | -5.727263693 | PYCRL    | -4.968218565 | PYURF    | -4.415677542 |
| CRYM     | -8.153673265 | NCF1C   | -5.661433956 | GRHPR    | -4.967244922 | FEZ1     | -4.401871742 |
| MMP7     | -8.128744868 | PGAM1   | -5.605653693 | RPL36    | -4.962279569 | TGFB11   | -4.394918982 |
| HIST1H1C | -7.969389109 | GATM    | -5.590175273 | MAN2B1   | -4.951730442 | GSTP1    | -4.389395201 |
| CD70     | -7.545353076 | WDR62   | -5.534322038 | RPLP1    | -4.934909583 | PPIL1    | -4.386854707 |
| FTH1     | -7.437507395 | TRAF1   | -5.495847891 | TNN      | -4.930250715 | AKAP8L   | -4.373857366 |
| SERINC2  | -7.363210122 | DMD     | -5.495847891 | MTTP     | -4.930250715 | ARHGAP20 | -4.373857366 |
| HNF1B    | -7.246396457 | RPL14   | -5.494047148 | MT-CO3   | -4.910068094 | C5orf55  | -4.373857366 |
| HEY1     | -7.246396457 | TNF     | -5.48606687  | IL10     | -4.901104369 | GPR183   | -4.373857366 |
| KLK1     | -7.205257762 | MRPL23  | -5.469616349 | NCKAP5   | -4.871357026 | LRRK1    | -4.373857366 |
| CCL3     | -7.0756021   | STEAP3  | -5.456319526 | AICDA    | -4.865565388 | PIGR     | -4.356783853 |
| OAS3     | -7.017713556 | LGMN    | -5.416536034 | HNRNPM   | -4.846439394 | IER3     | -4.352483715 |
| CD80     | -6.856250133 | RRP1    | -5.415677542 | RPS19    | -4.832002587 | NFKBIA   | -4.3518176   |
| MSC      | -6.856250133 | MCOLN2  | -5.413802694 | MVD      | -4.809956481 | RPL12    | -4.351303355 |
| IFIT3    | -6.845016634 | CCNG1   | -5.40648837  | GAS2     | -4.797356444 | RHOT2    | -4.350524862 |
| DFNA5    | -6.72178067  | FDXR    | -5.387932551 | LDHA     | -4.77642192  | TOP3B    | -4.345288214 |
| CLNK     | -6.687273961 | SHKBP1  | -5.382318945 | CD274    | -4.767521215 | MFSD2A   | -4.330788644 |
| GIN54    | -6.64394653  | ICAM1   | -5.36634983  | ADAMTS12 | -4.745826144 | PRELID1  | -4.32967233  |
| CCL3L1   | -6.593491815 | AK4     | -5.365345866 | LAMP3    | -4.745826144 | SCARB1   | -4.327871161 |
| SLC1A1   | -6.590175273 | LGALS3  | -5.330788644 | HPDL     | -4.745826144 | LY6E     | -4.32410887  |
| QPRT     | -6.571796744 | IL21R   | -5.310778684 | GSTT1    | -4.745826144 | PDE4A    | -4.316141868 |
| PMAIP1   | -6.553680614 | ISYNA1  | -5.29762178  | IFIT1    | -4.71265928  | BNIP3    | -4.30939635  |
| EEFSEC   | -6.495847891 | UGT2B17 | -5.277349385 | PLEKHO2  | -4.71265928  | SCAMP4   | -4.308762338 |
| HSPA4L   | -6.479509154 | BCAS4   | -5.263674448 | RPLP2    | -4.70249494  | NME4     | -4.304316433 |
| ALPK2    | -6.476219084 | TMSB4X  | -5.243752514 | KCNV1    | -4.678711948 | TRAPPC5  | -4.286394525 |
| PDCD1LG2 | -6.456319526 | ILDR1   | -5.240590835 | BOP1     | -4.678711948 | TNFSF11  | -4.286394525 |
| PIK3R6   | -6.453454193 | CCL4    | -5.220213448 | TOMM40   | -4.678711948 | GSDMD    | -4.286394525 |
| DBNDD1   | -6.308762338 | RPS27A  | -5.213460414 | CXCR7    | -4.64394653  | BCAR1    | -4.286394525 |
| CYBA     | -6.286394525 | C6orf57 | -5.193285121 | GHDC     | -4.626244528 | ABCA6    | -4.266216643 |
| SLC12A8  | -6.205257762 | AHRR    | -5.193285121 | MYO1C    | -4.624264164 | MT1E     | -4.256020876 |
| ACTB     | -6.191952608 | STC2    | -5.169037574 | STEAP2   | -4.60832262  | ATP5G3   | -4.250311601 |
| NRSN2    | -6.169037574 | CHAC1   | -5.164138775 | SPAG16   | -4.60832262  | IL23R    | -4.240590835 |
| DUSP4    | -6.140817701 | CCL4L1  | -5.14437552  | ACADS    | -4.60832262  | BAK1     | -4.222579427 |
| PFN1     | -6.069034067 | RAB38   | -5.141262908 | ARID5A   | -4.601091051 | DHCR24   | -4.219280329 |
| FKBP8    | -6.047945757 | MYO6    | -5.11082296  | LPCAT1   | -4.590175273 | SESN2    | -4.217131863 |
| GNG11    | -6.01431498  | LMNA    | -5.107128477 | ISG15    | -4.574857935 | VDAC1    | -4.20470736  |
| PPAN     | -5.996052773 | TPI1    | -5.098256552 | PTGR1    | -4.571796744 | ACSM3    | -4.200664651 |
| NTRK2    | -5.986834243 | ARHGDI1 | -5.080810391 | PTPRCAP  | -4.540151117 | UPB1     | -4.193285121 |
| IFI30    | -5.979345264 | PYGB    | -5.076471456 | DENND6B  | -4.534322038 | DNAJC30  | -4.193285121 |
| EBI3     | -5.889278934 | GAPDH   | -5.071976431 | RASSF6   | -4.534322038 | MUC19    | -4.193285121 |
| TUBA1B   | -5.879426456 | PIDD    | -5.067754239 | NAA60    | -4.534322038 | C17orf99 | -4.193285121 |
| IL4I1    | -5.8543506   | ATP5D   | -5.041282027 | ENO2     | -4.510396199 | GJC1     | -4.193285121 |
| ALDOC    | -5.851179144 | MT2A    | -5.041282027 | LSM4     | -4.503625241 | TRAF4    | -4.193285121 |
| TMEM38A  | -5.840983377 | PRDX1   | -5.029533631 | NCF1B    | -4.501407416 | HSF1     | -4.193285121 |
