# Supplementary material for: EWSR1/ELF5 induces acute myeloid leukemia by inhibiting p53/p21 pathway
Source: PubMed Central journal article supplement — Cancer Sci. 2016 Nov 25;107(12):1745–54. doi: 10.1111/cas.13080 (PMC5198945; doi:10.1111/cas.13080), 2016-11-25
Supplement: CAS-107-1745-s004.pdf [file CAS-107-1745-s004.pdf]

# Supporting data S2.

## Gene ontology terms mutation identified

| GO term                                                                          | Count |
|----------------------------------------------------------------------------------|-------|
| proteolysis                                                                      | 10    |
| immune response                                                                  | 9     |
| post-translational protein modification                                          | 9     |
| regulation of transcription from RNA polymerase II promoter                      | 8     |
| protein N-linked glycosylation via asparagine                                    | 7     |
| ER to Golgi vesicle-mediated transport                                           | 6     |
| chromatin organization                                                           | 6     |
| protein ubiquitination involved in ubiquitin-dependent protein catabolic process | 5     |
| G2/M transition of mitotic cell cycle                                            | 5     |
| intrinsic apoptotic signaling pathway                                            | 4     |
| microtubule cytoskeleton organization                                            | 4     |
| protein processing                                                               | 4     |
| vesicle-mediated transport                                                       | 4     |
| proteasome-mediated ubiquitin-dependent protein catabolic process                | 4     |
| DNA replication, recombination, and repair                                       | 4     |
| negative regulation of DNA binding                                               | 3     |
| proteolysis involved in cellular protein catabolic process                       | 3     |
| negative regulation of phosphatase activity                                      | 3     |
| histamine biosynthetic process                                                   | 2     |
| regulation of cell-substrate adhesion                                            | 2     |
| nuclear membrane organization                                                    | 2     |
| positive regulation of pri-miRNA transcription from RNA polymerase II promoter   | 2     |
| DNA topological change                                                           | 2     |
| negative regulation of retrograde protein transport, ER to cytosol               | 2     |

Pathway analysis results mutation identified

Protein processing in endoplasmic reticulum

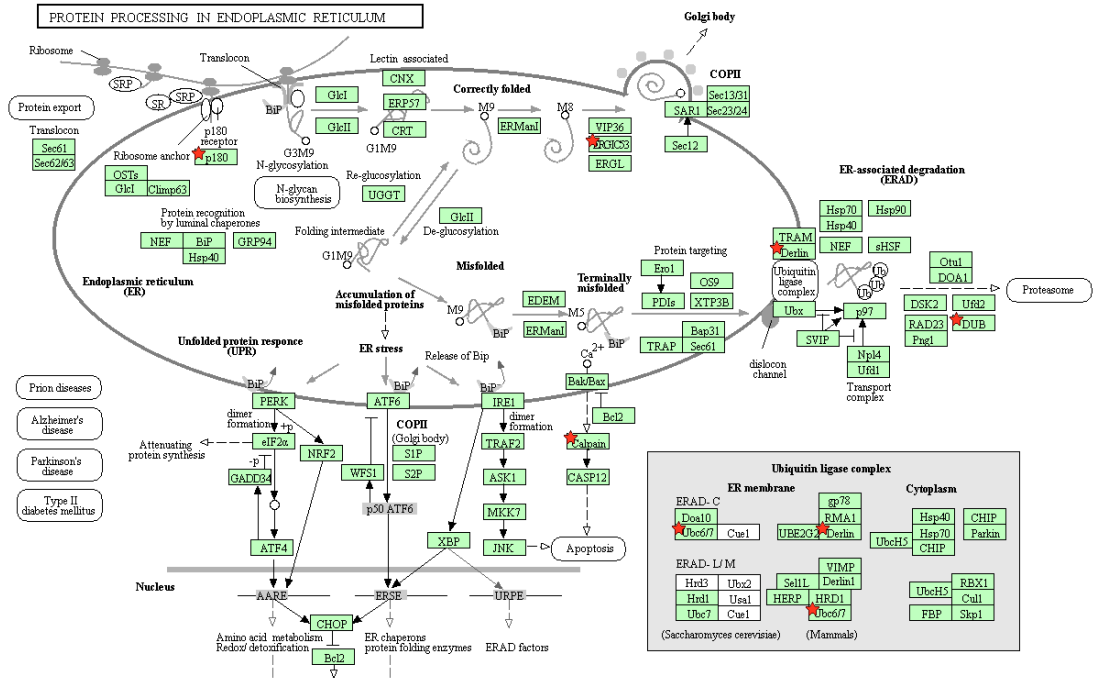

Control of Gene Expression by Vitamin D Receptor

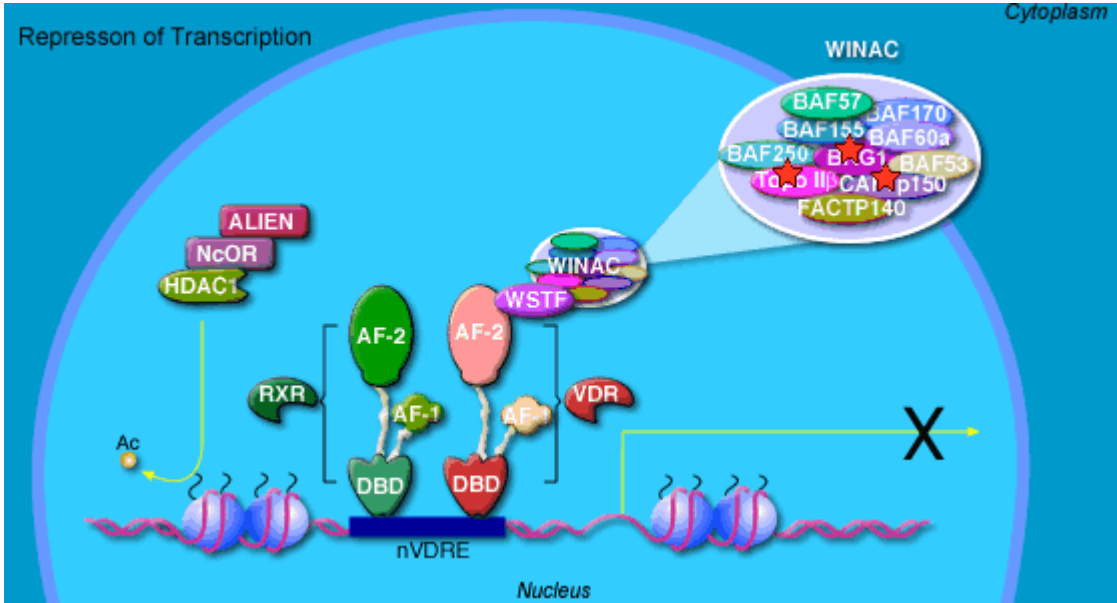

# Supporting data S4.

## Gene ontology terms expression silenced

| GO term                                                                                          | Count |
|--------------------------------------------------------------------------------------------------|-------|
| small molecule metabolic process                                                                 | 32    |
| gene expression                                                                                  | 22    |
| apoptotic process                                                                                | 18    |
| innate immune response                                                                           | 18    |
| mitotic cell cycle                                                                               | 17    |
| translation                                                                                      | 14    |
| viral process                                                                                    | 14    |
| cellular nitrogen compound metabolic process                                                     | 12    |
| negative regulation of apoptotic process                                                         | 12    |
| response to drug                                                                                 | 11    |
| RNA splicing                                                                                     | 10    |
| neurotrophin TRK receptor signaling pathway                                                      | 10    |
| multicellular organismal development                                                             | 10    |
| cell division                                                                                    | 9     |
| DNA repair                                                                                       | 9     |
| SRP-dependent cotranslational protein targeting to membrane                                      | 8     |
| mRNA processing                                                                                  | 8     |
| regulation of cell proliferation                                                                 | 8     |
| organelle organization                                                                           | 8     |
| translational initiation                                                                         | 7     |
| viral life cycle                                                                                 | 7     |
| mitotic nuclear division                                                                         | 7     |
| translational termination                                                                        | 6     |
| selenocysteine metabolic process                                                                 | 6     |
| translational elongation                                                                         | 6     |
| peptidyl-tyrosine dephosphorylation                                                              | 6     |
| viral transcription                                                                              | 6     |
| selenium compound metabolic process                                                              | 6     |
| nuclear-transcribed mRNA catabolic process, nonsense-mediated decay                              | 6     |
| G2/M transition of mitotic cell cycle                                                            | 6     |
| tumor necrosis factor-mediated signaling pathway                                                 | 6     |
| G1/S transition of mitotic cell cycle                                                            | 6     |
| DNA strand elongation involved in DNA replication                                                | 5     |
| response to toxic substance                                                                      | 5     |
| antigen processing and presentation of peptide antigen via MHC class I                           | 5     |
| apoptotic signaling pathway                                                                      | 5     |
| regulation of cell shape                                                                         | 5     |
| positive regulation of NF-kappaB transcription factor activity                                   | 5     |
| telomere maintenance via semi-conservative replication                                           | 4     |
| telomere maintenance via recombination                                                           | 4     |
| telomere maintenance                                                                             | 4     |
| T cell costimulation                                                                             | 4     |
| response to nutrient                                                                             | 4     |
| anaphase-promoting complex-dependent proteasomal ubiquitin-dependent protein catabolic process   | 4     |
| establishment or maintenance of transmembrane electrochemical gradient                           | 3     |
| regulation of reactive oxygen species metabolic process                                          | 3     |
| spindle assembly                                                                                 | 3     |
| inactivation of MAPK activity                                                                    | 3     |
| DNA replication initiation                                                                       | 3     |
| DNA damage response, detection of DNA damage                                                     | 3     |
| nucleotide-excision repair, DNA incision                                                         | 3     |
| regulation of cyclin-dependent protein serine/threonine kinase activity                          | 3     |
| positive regulation of actin filament polymerization                                             | 3     |
| negative regulation of glucose import in response to insulin stimulus                            | 2     |
| T cell antigen processing and presentation                                                       | 2     |
| DNA replication, synthesis of RNA primer                                                         | 2     |
| regulation of transcription from RNA polymerase I promoter                                       | 2     |
| positive regulation by host of viral genome replication                                          | 2     |
| negative regulation of systemic arterial blood pressure                                          | 2     |
| ribosome assembly                                                                                | 2     |
| negative regulation of protein kinase activity by regulation of protein phosphorylation          | 2     |
| activation of cysteine-type endopeptidase activity involved in apoptotic process by cytochrome c | 2     |

# Supporting data S5.

## Pathway analysis results expression silenced

| Pathway                                 | Count |
|-----------------------------------------|-------|
| DNA replication                         | 5     |
| Viral carcinogenesis                    | 8     |
| Ribosome                                | 8     |
| Epstein-Barr virus infection            | 7     |
| DNA replication                         | 5     |
| TNF signaling pathway                   | 5     |
| NF-kappa B signaling pathway            | 5     |
| Glycolysis / Gluconeogenesis            | 4     |
| Carbohydrate digestion and absorption   | 4     |
| Proximal tubule bicarbonate reclamation | 3     |
